# Supplementary material for: RNA Sequencing (RNA-Seq) Reveals Extremely Low Levels of Reticulocyte-Derived Globin Gene Transcripts in Peripheral Blood From Horses (Equus caballus) and Cattle (Bos taurus)
Source: Front Genet. 2018 Aug 14;9:278. doi: 10.3389/fgene.2018.00278 (PMC6102425; doi:10.3389/fgene.2018.00278)
Supplement: Supplementary file 4 [file Table_4.xlsx]

## Sheet: Supp_table_04
	Supplementary Table 4: Complete RNA-seq filtering/trimming statistics.
	Species	Sample code	Treatment group	Sample name	Library type	Total number of reads (SE) or pairs (PE)	Sequence reads (SE) or pairs (PE) removed	Percentage of reads (SE) or pairs (PE) removed
	Homo sapiens	Hsa_S01_U	Undepleted	SRR1060788	Paired-end	25998485	5248910	0.20189
	Homo sapiens	Hsa_S01_U	Undepleted	SRR1060776	Paired-end	28021451	5624724	0.20073
	Homo sapiens	Hsa_S02_U	Undepleted	SRR1060777	Paired-end	36770004	7063660	0.1921
	Homo sapiens	Hsa_S02_U	Undepleted	SRR1060789	Paired-end	34002573	6563460	0.19303
	Homo sapiens	Hsa_S03_U	Undepleted	SRR1060790	Paired-end	26340293	5209473	0.19778
	Homo sapiens	Hsa_S03_U	Undepleted	SRR1060778	Paired-end	28734878	5619401	0.19556
	Homo sapiens	Hsa_S04_U	Undepleted	SRR1060791	Paired-end	19970884	4170894	0.20885
	Homo sapiens	Hsa_S04_U	Undepleted	SRR1060779	Paired-end	21100408	4334616	0.20543
	Homo sapiens	Hsa_S05_U	Undepleted	SRR1060792	Paired-end	24487792	4792804	0.19572
	Homo sapiens	Hsa_S05_U	Undepleted	SRR1060780	Paired-end	25282543	4910045	0.19421
	Homo sapiens	Hsa_S06_U	Undepleted	SRR1060781	Paired-end	20816412	4142637	0.19901
	Homo sapiens	Hsa_S06_U	Undepleted	SRR1060793	Paired-end	19617134	3944822	0.20109
	Homo sapiens	Hsa_P19_U	Undepleted	SRR1060794	Paired-end	18214618	3770918	0.20703
	Homo sapiens	Hsa_P19_U	Undepleted	SRR1060782	Paired-end	19420602	3981223	0.205
	Homo sapiens	Hsa_P20_U	Undepleted	SRR1060795	Paired-end	14333697	3170259	0.22118
	Homo sapiens	Hsa_P20_U	Undepleted	SRR1060783	Paired-end	15708695	3406168	0.21683
	Homo sapiens	Hsa_P21_U	Undepleted	SRR1060784	Paired-end	12931138	2524533	0.19523
	Homo sapiens	Hsa_P21_U	Undepleted	SRR1060796	Paired-end	12492463	2464677	0.19729
	Homo sapiens	Hsa_P22_U	Undepleted	SRR1060785	Paired-end	13933960	3091961	0.2219
	Homo sapiens	Hsa_P22_U	Undepleted	SRR1060797	Paired-end	13137464	3008175	0.22898
	Homo sapiens	Hsa_P23_U	Undepleted	SRR1060798	Paired-end	13903521	2973664	0.21388
	Homo sapiens	Hsa_P23_U	Undepleted	SRR1060786	Paired-end	14536091	3034757	0.20877
	Homo sapiens	Hsa_P24_U	Undepleted	SRR1060799	Paired-end	11134266	2662059	0.23909
	Homo sapiens	Hsa_P24_U	Undepleted	SRR1060787	Paired-end	11737260	2724762	0.23215
	Homo sapiens	Hsa_S01_D	Globin depleted	SRR1060753	Paired-end	12083804	4493615	0.37187
	Homo sapiens	Hsa_S01_D	Globin depleted	SRR1060765	Paired-end	11022354	4259707	0.38646
	Homo sapiens	Hsa_S02_D	Globin depleted	SRR1060754	Paired-end	36467109	8317048	0.22807
	Homo sapiens	Hsa_S02_D	Globin depleted	SRR1060766	Paired-end	32159063	7132442	0.22179
	Homo sapiens	Hsa_S03_D	Globin depleted	SRR1060755	Paired-end	28697162	7995002	0.2786
	Homo sapiens	Hsa_S03_D	Globin depleted	SRR1060767	Paired-end	25462031	7056912	0.27715
	Homo sapiens	Hsa_S04_D	Globin depleted	SRR1060756	Paired-end	14869486	5316297	0.35753
	Homo sapiens	Hsa_S04_D	Globin depleted	SRR1060768	Paired-end	13455119	4920343	0.36569
	Homo sapiens	Hsa_S05_D	Globin depleted	SRR1060769	Paired-end	29785254	6790787	0.22799
	Homo sapiens	Hsa_S05_D	Globin depleted	SRR1060757	Paired-end	33353039	7818499	0.23442
	Homo sapiens	Hsa_S06_D	Globin depleted	SRR1060770	Paired-end	19637331	6351594	0.32344
	Homo sapiens	Hsa_S06_D	Globin depleted	SRR1060758	Paired-end	22051065	6969636	0.31607
	Homo sapiens	Hsa_P07_D	Globin depleted	SRR1060759	Paired-end	23861756	6246870	0.26179
	Homo sapiens	Hsa_P07_D	Globin depleted	SRR1060771	Paired-end	21467700	5748326	0.26777
	Homo sapiens	Hsa_P08_D	Globin depleted	SRR1060772	Paired-end	6841913	3848321	0.56246
	Homo sapiens	Hsa_P08_D	Globin depleted	SRR1060760	Paired-end	7236029	3872302	0.53514
	Homo sapiens	Hsa_P09_D	Globin depleted	SRR1060773	Paired-end	21614867	5986936	0.27698
	Homo sapiens	Hsa_P09_D	Globin depleted	SRR1060761	Paired-end	24408714	6791455	0.27824
	Homo sapiens	Hsa_P10_D	Globin depleted	SRR1060774	Paired-end	2059836	1585234	0.76959
	Homo sapiens	Hsa_P10_D	Globin depleted	SRR1060762	Paired-end	1987399	1465374	0.73733
	Homo sapiens	Hsa_P11_D	Globin depleted	SRR1060775	Paired-end	14533406	4190164	0.28831
	Homo sapiens	Hsa_P11_D	Globin depleted	SRR1060763	Paired-end	16144646	4617074	0.28598
	Homo sapiens	Hsa_P12_D	Globin depleted	SRR1060764	Paired-end	23298020	6675116	0.28651
	Sus scrofa	Ssc_01_U	Undepleted	7197C	Paired-end	13559636	2474505	0.18249
	Sus scrofa	Ssc_01_U	Undepleted	7197C	Paired-end	13571209	1938998	0.14288
	Sus scrofa	Ssc_02_U	Undepleted	7199CT	Paired-end	47083934	3456280	0.07341
	Sus scrofa	Ssc_03_U	Undepleted	7210C	Paired-end	14384129	2606170	0.18118
	Sus scrofa	Ssc_03_U	Undepleted	7210C	Paired-end	14385798	2035049	0.14146
	Sus scrofa	Ssc_04_U	Undepleted	7312CT	Paired-end	46945665	2934998	0.06252
	Sus scrofa	Ssc_05_U	Undepleted	7349CT	Paired-end	48648269	3179770	0.06536
	Sus scrofa	Ssc_06_U	Undepleted	7413C	Paired-end	13125254	2395124	0.18248
	Sus scrofa	Ssc_06_U	Undepleted	7413C	Paired-end	13126998	1875185	0.14285
	Sus scrofa	Ssc_07_U	Undepleted	7437C	Paired-end	10917349	1582794	0.14498
	Sus scrofa	Ssc_07_U	Undepleted	7437C	Paired-end	10910084	2011436	0.18436
	Sus scrofa	Ssc_08_U	Undepleted	7439C	Paired-end	13057675	2383001	0.1825
	Sus scrofa	Ssc_08_U	Undepleted	7439C	Paired-end	13063548	1861916	0.14253
	Sus scrofa	Ssc_09_U	Undepleted	7467C	Paired-end	12962963	1828393	0.14105
	Sus scrofa	Ssc_09_U	Undepleted	7467C	Paired-end	12967411	2326689	0.17943
	Sus scrofa	Ssc_10_U	Undepleted	7468CT	Paired-end	41186208	2938788	0.07135
	Sus scrofa	Ssc_11_U	Undepleted	7472C	Paired-end	13042994	2386223	0.18295
	Sus scrofa	Ssc_11_U	Undepleted	7472C	Paired-end	13058108	1863212	0.14269
	Sus scrofa	Ssc_12_U	Undepleted	7474C	Paired-end	12185767	1792292	0.14708
	Sus scrofa	Ssc_12_U	Undepleted	7474C	Paired-end	12182153	2269089	0.18626
	Sus scrofa	Ssc_01_D	Globin depleted	7197T	Paired-end	9844644	1432868	0.14555
	Sus scrofa	Ssc_01_D	Globin depleted	7197T	Paired-end	9858670	1793997	0.18197
	Sus scrofa	Ssc_02_D	Globin depleted	7199GD	Paired-end	33279500	2322610	0.06979
	Sus scrofa	Ssc_03_D	Globin depleted	7210T	Paired-end	11959632	1699666	0.14212
	Sus scrofa	Ssc_03_D	Globin depleted	7210T	Paired-end	11951361	2158011	0.18057
	Sus scrofa	Ssc_04_D	Globin depleted	7312GD	Paired-end	27017041	2370817	0.08775
	Sus scrofa	Ssc_05_D	Globin depleted	7349GD	Paired-end	36253804	2553836	0.07044
	Sus scrofa	Ssc_06_D	Globin depleted	7413T	Paired-end	14093398	2005688	0.14231
	Sus scrofa	Ssc_06_D	Globin depleted	7413T	Paired-end	14100297	2539582	0.18011
	Sus scrofa	Ssc_07_D	Globin depleted	7437T	Paired-end	11877123	1641618	0.13822
	Sus scrofa	Ssc_07_D	Globin depleted	7437T	Paired-end	11892746	2084855	0.1753
	Sus scrofa	Ssc_08_D	Globin depleted	7439T	Paired-end	10933965	1984798	0.18153
	Sus scrofa	Ssc_08_D	Globin depleted	7439T	Paired-end	10938335	1566527	0.14321
	Sus scrofa	Ssc_09_D	Globin depleted	7467T	Paired-end	11660687	1728774	0.14826
	Sus scrofa	Ssc_09_D	Globin depleted	7467T	Paired-end	11655494	2177289	0.1868
	Sus scrofa	Ssc_10_D	Globin depleted	7468GD	Paired-end	35892042	2470554	0.06883
	Sus scrofa	Ssc_11_D	Globin depleted	7472T	Paired-end	9938776	1802169	0.18133
	Sus scrofa	Ssc_11_D	Globin depleted	7472T	Paired-end	9948314	1424025	0.14314
	Sus scrofa	Ssc_12_D	Globin depleted	7474T	Paired-end	10149519	1801767	0.17752
	Sus scrofa	Ssc_12_D	Globin depleted	7474T	Paired-end	10153511	1434821	0.14131
	Equus caballus	Eca_T01_U	Undepleted	SRR3671009	Single-end	26301320	20820	0.00079
	Equus caballus	Eca_T02_U	Undepleted	SRR3671010	Single-end	29702412	25082	0.00084
	Equus caballus	Eca_T03_U	Undepleted	SRR3671011	Single-end	28886691	23705	0.00082
	Equus caballus	Eca_T04_U	Undepleted	SRR3671012	Single-end	26109331	21508	0.00082
	Equus caballus	Eca_T05_U	Undepleted	SRR3671013	Single-end	34079063	76316	0.00224
	Equus caballus	Eca_T06_U	Undepleted	SRR3671014	Single-end	28155698	63535	0.00226
	Equus caballus	Eca_T07_U	Undepleted	SRR3671015	Single-end	21155280	35430	0.00167
	Equus caballus	Eca_T08_U	Undepleted	SRR3671016	Single-end	29484441	67157	0.00228
	Equus caballus	Eca_T09_U	Undepleted	SRR3671017	Single-end	21639075	36832	0.0017
	Equus caballus	Eca_T10_U	Undepleted	SRR3671018	Single-end	21227778	37428	0.00176
	Equus caballus	Eca_T11_U	Undepleted	SRR3671019	Single-end	17342103	28026	0.00162
	Equus caballus	Eca_T12_U	Undepleted	SRR3671020	Single-end	16145701	28061	0.00174
	Equus caballus	Eca_S13_U	Undepleted	SRR3671021	Single-end	22216364	39010	0.00176
	Equus caballus	Eca_T14_U	Undepleted	SRR3671022	Single-end	23572319	19376	0.00082
	Equus caballus	Eca_T15_U	Undepleted	SRR3671023	Single-end	23633823	19024	0.0008
	Equus caballus	Eca_T16_U	Undepleted	SRR3671024	Single-end	22897075	50907	0.00222
	Equus caballus	Eca_T17_U	Undepleted	SRR3671025	Single-end	21051693	48312	0.00229
	Equus caballus	Eca_T18_U	Undepleted	SRR3671026	Single-end	27008689	60219	0.00223
	Equus caballus	Eca_T19_U	Undepleted	SRR3671027	Single-end	22626370	51569	0.00228
	Equus caballus	Eca_T20_U	Undepleted	SRR3671028	Single-end	26132187	21242	0.00081
	Equus caballus	Eca_T21_U	Undepleted	SRR3671029	Single-end	20873831	34986	0.00168
	Equus caballus	Eca_T22_U	Undepleted	SRR3671030	Single-end	22813215	36606	0.0016
	Equus caballus	Eca_T23_U	Undepleted	SRR3671031	Single-end	21985359	36758	0.00167
	Equus caballus	Eca_T24_U	Undepleted	SRR3671032	Single-end	16779324	28263	0.00168
	Equus caballus	Eca_T25_U	Undepleted	SRR3671033	Single-end	26930023	21709	0.00081
	Equus caballus	Eca_T26_U	Undepleted	SRR3671034	Single-end	22646219	18235	0.00081
	Equus caballus	Eca_T27_U	Undepleted	SRR3671035	Single-end	26592444	47782	0.0018
	Equus caballus	Eca_T28_U	Undepleted	SRR3671036	Single-end	23671814	41711	0.00176
	Equus caballus	Eca_T29_U	Undepleted	SRR3671037	Single-end	27905161	49985	0.00179
	Equus caballus	Eca_T30_U	Undepleted	SRR3671038	Single-end	29436692	52742	0.00179
	Equus caballus	Eca_T31_U	Undepleted	SRR3671039	Single-end	29007129	51791	0.00179
	Equus caballus	Eca_T32_U	Undepleted	SRR3671040	Single-end	24217526	40698	0.00168
	Equus caballus	Eca_S33_U	Undepleted	SRR3671041	Single-end	22504808	41421	0.00184
	Equus caballus	Eca_S34_U	Undepleted	SRR3671042	Single-end	23313083	40259	0.00173
	Equus caballus	Eca_S35_U	Undepleted	SRR3671043	Single-end	23162930	40667	0.00176
	Equus caballus	Eca_S36_U	Undepleted	SRR3671044	Single-end	22973911	40469	0.00176
	Equus caballus	Eca_S37_U	Undepleted	SRR3671045	Single-end	23851326	41360	0.00173
	Bos taurus	Bta_01_U	Undepleted	A6511_W-1_F_001	Paired-end	2633876	140003	0.05315
	Bos taurus	Bta_01_U	Undepleted	A6511_W-1_F_002	Paired-end	2671193	704856	0.26387
	Bos taurus	Bta_01_U	Undepleted	A6511_W-1_F_003	Paired-end	3191182	899916	0.282
	Bos taurus	Bta_01_U	Undepleted	A6511_W-1_F_004	Paired-end	4858220	600993	0.12371
	Bos taurus	Bta_01_U	Undepleted	A6511_W-1_F_005	Paired-end	4822516	595523	0.12349
	Bos taurus	Bta_02_U	Undepleted	A6514_W-1_F_001	Paired-end	3057096	225905	0.0739
	Bos taurus	Bta_02_U	Undepleted	A6514_W-1_F_002	Paired-end	3058831	885925	0.28963
	Bos taurus	Bta_02_U	Undepleted	A6514_W-1_F_003	Paired-end	3661145	1124800	0.30723
	Bos taurus	Bta_02_U	Undepleted	A6514_W-1_F_004	Paired-end	5982579	820070	0.13708
	Bos taurus	Bta_02_U	Undepleted	A6514_W-1_F_005	Paired-end	5917203	809781	0.13685
	Bos taurus	Bta_03_U	Undepleted	A6520_W-1_F_001	Paired-end	3090371	240638	0.07787
	Bos taurus	Bta_03_U	Undepleted	A6520_W-1_F_002	Paired-end	3080666	818364	0.26565
	Bos taurus	Bta_03_U	Undepleted	A6520_W-1_F_003	Paired-end	3674375	1037774	0.28244
	Bos taurus	Bta_03_U	Undepleted	A6520_W-1_F_004	Paired-end	5810370	787350	0.13551
	Bos taurus	Bta_03_U	Undepleted	A6520_W-1_F_005	Paired-end	5731666	775380	0.13528
	Bos taurus	Bta_04_U	Undepleted	A6522_W-1_F_001	Paired-end	2899122	354174	0.12217
	Bos taurus	Bta_04_U	Undepleted	A6522_W-1_F_002	Paired-end	2892626	876500	0.30301
	Bos taurus	Bta_04_U	Undepleted	A6522_W-1_F_003	Paired-end	3450536	1094315	0.31714
	Bos taurus	Bta_04_U	Undepleted	A6522_W-1_F_004	Paired-end	5397177	891211	0.16513
	Bos taurus	Bta_04_U	Undepleted	A6522_W-1_F_005	Paired-end	5325510	879659	0.16518
	Bos taurus	Bta_05_U	Undepleted	A6526_W-1_F_001	Paired-end	3109670	189064	0.0608
	Bos taurus	Bta_05_U	Undepleted	A6526_W-1_F_002	Paired-end	3084235	830429	0.26925
	Bos taurus	Bta_05_U	Undepleted	A6526_W-1_F_003	Paired-end	3696826	1063506	0.28768
	Bos taurus	Bta_05_U	Undepleted	A6526_W-1_F_004	Paired-end	6318143	816056	0.12916
	Bos taurus	Bta_05_U	Undepleted	A6526_W-1_F_005	Paired-end	6257734	809908	0.12943
	Bos taurus	Bta_06_U	Undepleted	A6635_W-1_F_001	Paired-end	2924247	144260	0.04933
	Bos taurus	Bta_06_U	Undepleted	A6635_W-1_F_002	Paired-end	2896737	678110	0.23409
	Bos taurus	Bta_06_U	Undepleted	A6635_W-1_F_003	Paired-end	3468465	874155	0.25203
	Bos taurus	Bta_06_U	Undepleted	A6635_W-1_F_004	Paired-end	5775984	695713	0.12045
	Bos taurus	Bta_06_U	Undepleted	A6635_W-1_F_005	Paired-end	5710110	689689	0.12078
	Bos taurus	Bta_07_U	Undepleted	A6636_W-1_F_001	Paired-end	2632827	151176	0.05742
	Bos taurus	Bta_07_U	Undepleted	A6636_W-1_F_002	Paired-end	2650395	676802	0.25536
	Bos taurus	Bta_07_U	Undepleted	A6636_W-1_F_003	Paired-end	3170501	865353	0.27294
	Bos taurus	Bta_07_U	Undepleted	A6636_W-1_F_004	Paired-end	5197819	665003	0.12794
	Bos taurus	Bta_07_U	Undepleted	A6636_W-1_F_005	Paired-end	5143297	658930	0.12811
	Bos taurus	Bta_08_U	Undepleted	A6637_W-1_F_001	Paired-end	2482368	129430	0.05214
	Bos taurus	Bta_08_U	Undepleted	A6637_W-1_F_002	Paired-end	2499024	561743	0.22478
	Bos taurus	Bta_08_U	Undepleted	A6637_W-1_F_003	Paired-end	2977126	727220	0.24427
	Bos taurus	Bta_08_U	Undepleted	A6637_W-1_F_004	Paired-end	4538661	556771	0.12267
	Bos taurus	Bta_08_U	Undepleted	A6637_W-1_F_005	Paired-end	4491764	554872	0.12353
	Bos taurus	Bta_09_U	Undepleted	A6644_W-1_F_001	Paired-end	4237621	280732	0.06625
	Bos taurus	Bta_09_U	Undepleted	A6644_W-1_F_002	Paired-end	3713032	980264	0.26401
	Bos taurus	Bta_09_U	Undepleted	A6644_W-1_F_003	Paired-end	4309179	1338268	0.31056
	Bos taurus	Bta_09_U	Undepleted	A6644_W-1_F_004	Paired-end	5334560	696341	0.13053
	Bos taurus	Bta_09_U	Undepleted	A6644_W-1_F_005	Paired-end	5244064	647132	0.1234
	Bos taurus	Bta_10_U	Undepleted	A6698_W-1_F_001	Paired-end	4075805	311968	0.07654
	Bos taurus	Bta_10_U	Undepleted	A6698_W-1_F_002	Paired-end	3480449	939784	0.27002
	Bos taurus	Bta_10_U	Undepleted	A6698_W-1_F_003	Paired-end	4035453	1269865	0.31468
	Bos taurus	Bta_10_U	Undepleted	A6698_W-1_F_004	Paired-end	5198524	715727	0.13768
	Bos taurus	Bta_10_U	Undepleted	A6698_W-1_F_005	Paired-end	5098947	664558	0.13033
