# Supplementary material for: RNA Sequencing (RNA-Seq) Reveals Extremely Low Levels of Reticulocyte-Derived Globin Gene Transcripts in Peripheral Blood From Horses (Equus caballus) and Cattle (Bos taurus)
Source: Front Genet. 2018 Aug 14;9:278. doi: 10.3389/fgene.2018.00278 (PMC6102425; doi:10.3389/fgene.2018.00278)
Supplement: Supplementary file 6 [file Table_6.xlsx]

## Sheet: globin-proportion
	Supplementary Table 6: Proportion of haemoglobin gene-level TPM per sample.
	Species	Sample code	Treatment group	Total TPM (all expressed genes)	Haemoglobin genes TPM*	Proportion of haemoglobin genes TPM (%)*
	Homo sapiens	Hsa_S01_U	Undepleted	992487	674464	67.9569
	Homo sapiens	Hsa_S02_U	Undepleted	989701	711381	71.8784
	Homo sapiens	Hsa_S03_U	Undepleted	988611	709024	71.7192
	Homo sapiens	Hsa_S04_U	Undepleted	990127	720605	72.7791
	Homo sapiens	Hsa_S05_U	Undepleted	989130	680208	68.7683
	Homo sapiens	Hsa_S06_U	Undepleted	991435	697930	70.3959
	Homo sapiens	Hsa_P19_U	Undepleted	990469	674917	68.1411
	Homo sapiens	Hsa_P20_U	Undepleted	991930	674502	67.999
	Homo sapiens	Hsa_P21_U	Undepleted	993237	729321	73.4287
	Homo sapiens	Hsa_P22_U	Undepleted	991881	662271	66.7692
	Homo sapiens	Hsa_P23_U	Undepleted	993145	698194	70.3013
	Homo sapiens	Hsa_P24_U	Undepleted	991681	684940	69.0686
	Homo sapiens	Hsa_S01_D	Globin depleted	991892	121829	12.2825
	Homo sapiens	Hsa_S02_D	Globin depleted	988516	85957	8.69556
	Homo sapiens	Hsa_S03_D	Globin depleted	987549	164924	16.7003
	Homo sapiens	Hsa_S04_D	Globin depleted	987041	171548	17.38
	Homo sapiens	Hsa_S05_D	Globin depleted	992826	107129	10.7903
	Homo sapiens	Hsa_S06_D	Globin depleted	990939	121230	12.2338
	Homo sapiens	Hsa_P07_D	Globin depleted	993481	191531	19.2788
	Homo sapiens	Hsa_P08_D	Globin depleted	992837	321728	32.4049
	Homo sapiens	Hsa_P09_D	Globin depleted	993229	168553	16.9702
	Homo sapiens	Hsa_P10_D	Globin depleted	981317	164541	16.7674
	Homo sapiens	Hsa_P11_D	Globin depleted	992047	190226	19.1751
	Homo sapiens	Hsa_P12_D	Globin depleted	993603	198477	19.9755
	Sus scrofa	Ssc_01_U	Undepleted	998819	713140	71.3983
	Sus scrofa	Ssc_02_U	Undepleted	999057	709691	71.0361
	Sus scrofa	Ssc_03_U	Undepleted	998458	804180	80.5422
	Sus scrofa	Ssc_04_U	Undepleted	998852	731797	73.2638
	Sus scrofa	Ssc_05_U	Undepleted	998011	640290	64.1566
	Sus scrofa	Ssc_06_U	Undepleted	998194	765749	76.7135
	Sus scrofa	Ssc_07_U	Undepleted	997361	758732	76.0739
	Sus scrofa	Ssc_08_U	Undepleted	998803	793354	79.4304
	Sus scrofa	Ssc_09_U	Undepleted	997577	607817	60.9294
	Sus scrofa	Ssc_10_U	Undepleted	998698	671981	67.2858
	Sus scrofa	Ssc_11_U	Undepleted	998633	810017	81.1126
	Sus scrofa	Ssc_12_U	Undepleted	997514	636049	63.7634
	Sus scrofa	Ssc_01_D	Globin depleted	995612	96476.6	9.69017
	Sus scrofa	Ssc_02_D	Globin depleted	996360	70046.5	7.03024
	Sus scrofa	Ssc_03_D	Globin depleted	996521	600233	60.2329
	Sus scrofa	Ssc_04_D	Globin depleted	995658	103913	10.4366
	Sus scrofa	Ssc_05_D	Globin depleted	995084	89091.5	8.95316
	Sus scrofa	Ssc_06_D	Globin depleted	995064	394718	39.6675
	Sus scrofa	Ssc_07_D	Globin depleted	994138	455488	45.8174
	Sus scrofa	Ssc_08_D	Globin depleted	994078	107198	10.7837
	Sus scrofa	Ssc_09_D	Globin depleted	995187	102189	10.2683
	Sus scrofa	Ssc_10_D	Globin depleted	995267	41028.5	4.12237
	Sus scrofa	Ssc_11_D	Globin depleted	996504	551627	55.3563
	Sus scrofa	Ssc_12_D	Globin depleted	993699	30453.5	3.06466
	Equus caballus	Eca_T01_U	Undepleted	995358	5445.67	0.547106
	Equus caballus	Eca_T02_U	Undepleted	995854	3509.27	0.352388
	Equus caballus	Eca_T03_U	Undepleted	994071	670.51	0.0674509
	Equus caballus	Eca_T04_U	Undepleted	995951	1381.42	0.138704
	Equus caballus	Eca_T05_U	Undepleted	996411	2064.38	0.207181
	Equus caballus	Eca_T06_U	Undepleted	994257	1110.03	0.111644
	Equus caballus	Eca_T07_U	Undepleted	995667	623.758	0.0626472
	Equus caballus	Eca_T08_U	Undepleted	996499	895.409	0.0898554
	Equus caballus	Eca_T09_U	Undepleted	996387	1352.75	0.135766
	Equus caballus	Eca_T10_U	Undepleted	995542	2606.24	0.261791
	Equus caballus	Eca_T11_U	Undepleted	996052	2125.15	0.213357
	Equus caballus	Eca_T12_U	Undepleted	995819	1002.31	0.100652
	Equus caballus	Eca_S13_U	Undepleted	993270	834.762	0.0840418
	Equus caballus	Eca_T14_U	Undepleted	996141	252.803	0.0253782
	Equus caballus	Eca_T15_U	Undepleted	996455	4647.24	0.466377
	Equus caballus	Eca_T16_U	Undepleted	994790	1705.15	0.171408
	Equus caballus	Eca_T17_U	Undepleted	996493	1348.45	0.13532
	Equus caballus	Eca_T18_U	Undepleted	994687	777.827	0.0781982
	Equus caballus	Eca_T19_U	Undepleted	994696	992.649	0.0997942
	Equus caballus	Eca_T20_U	Undepleted	996552	370.243	0.0371524
	Equus caballus	Eca_T21_U	Undepleted	995531	2331.54	0.234201
	Equus caballus	Eca_T22_U	Undepleted	996217	10624.5	1.06649
	Equus caballus	Eca_T23_U	Undepleted	995032	5104.12	0.51296
	Equus caballus	Eca_T24_U	Undepleted	996167	898.088	0.0901544
	Equus caballus	Eca_T25_U	Undepleted	994189	6740.8	0.67802
	Equus caballus	Eca_T26_U	Undepleted	995083	152.457	0.0153211
	Equus caballus	Eca_T27_U	Undepleted	992579	405.539	0.0408571
	Equus caballus	Eca_T28_U	Undepleted	994691	362.832	0.0364769
	Equus caballus	Eca_T29_U	Undepleted	990999	8404.28	0.848061
	Equus caballus	Eca_T30_U	Undepleted	993584	1049.41	0.105619
	Equus caballus	Eca_T31_U	Undepleted	995083	4843.1	0.486703
	Equus caballus	Eca_T32_U	Undepleted	993627	49.8075	0.0050127
	Equus caballus	Eca_S33_U	Undepleted	995173	766.398	0.0770115
	Equus caballus	Eca_S34_U	Undepleted	995430	53.3674	0.00536124
	Equus caballus	Eca_S35_U	Undepleted	996467	666.003	0.0668364
	Equus caballus	Eca_S36_U	Undepleted	995919	1805.31	0.181271
	Equus caballus	Eca_S37_U	Undepleted	993834	466.611	0.0469506
	Bos taurus	Bta_01_U	Undepleted	995412	2601.21	0.26132
	Bos taurus	Bta_02_U	Undepleted	996104	1898.51	0.190594
	Bos taurus	Bta_03_U	Undepleted	996198	802.382	0.0805444
	Bos taurus	Bta_04_U	Undepleted	997173	4914.33	0.492826
	Bos taurus	Bta_05_U	Undepleted	995620	2908.29	0.292108
	Bos taurus	Bta_06_U	Undepleted	993781	2365.41	0.238021
	Bos taurus	Bta_07_U	Undepleted	995949	290.508	0.029169
	Bos taurus	Bta_08_U	Undepleted	995711	237.48	0.0238503
	Bos taurus	Bta_09_U	Undepleted	995797	275.567	0.027673
	Bos taurus	Bta_10_U	Undepleted	995746	240.568	0.0241596
	* Human: HBA1, HBA2 and HBB; Porcine: LOC110259958 (HBA) and LOC100737768 (HBA) ; Equine: HBA (HBA1), HBA2 and HBB; and Bovine: HBA1, HBA (HBA2) and HBB.
